# Supplementary material for: Towards the detection of copy number variation from single sperm sequencing in cattle
Source: PubMed Central journal article supplement (PMC8928590; doi:10.1186/s12864-022-08441-8), 2022-03-17

Figure S1. The density of CNV in each chromosome.

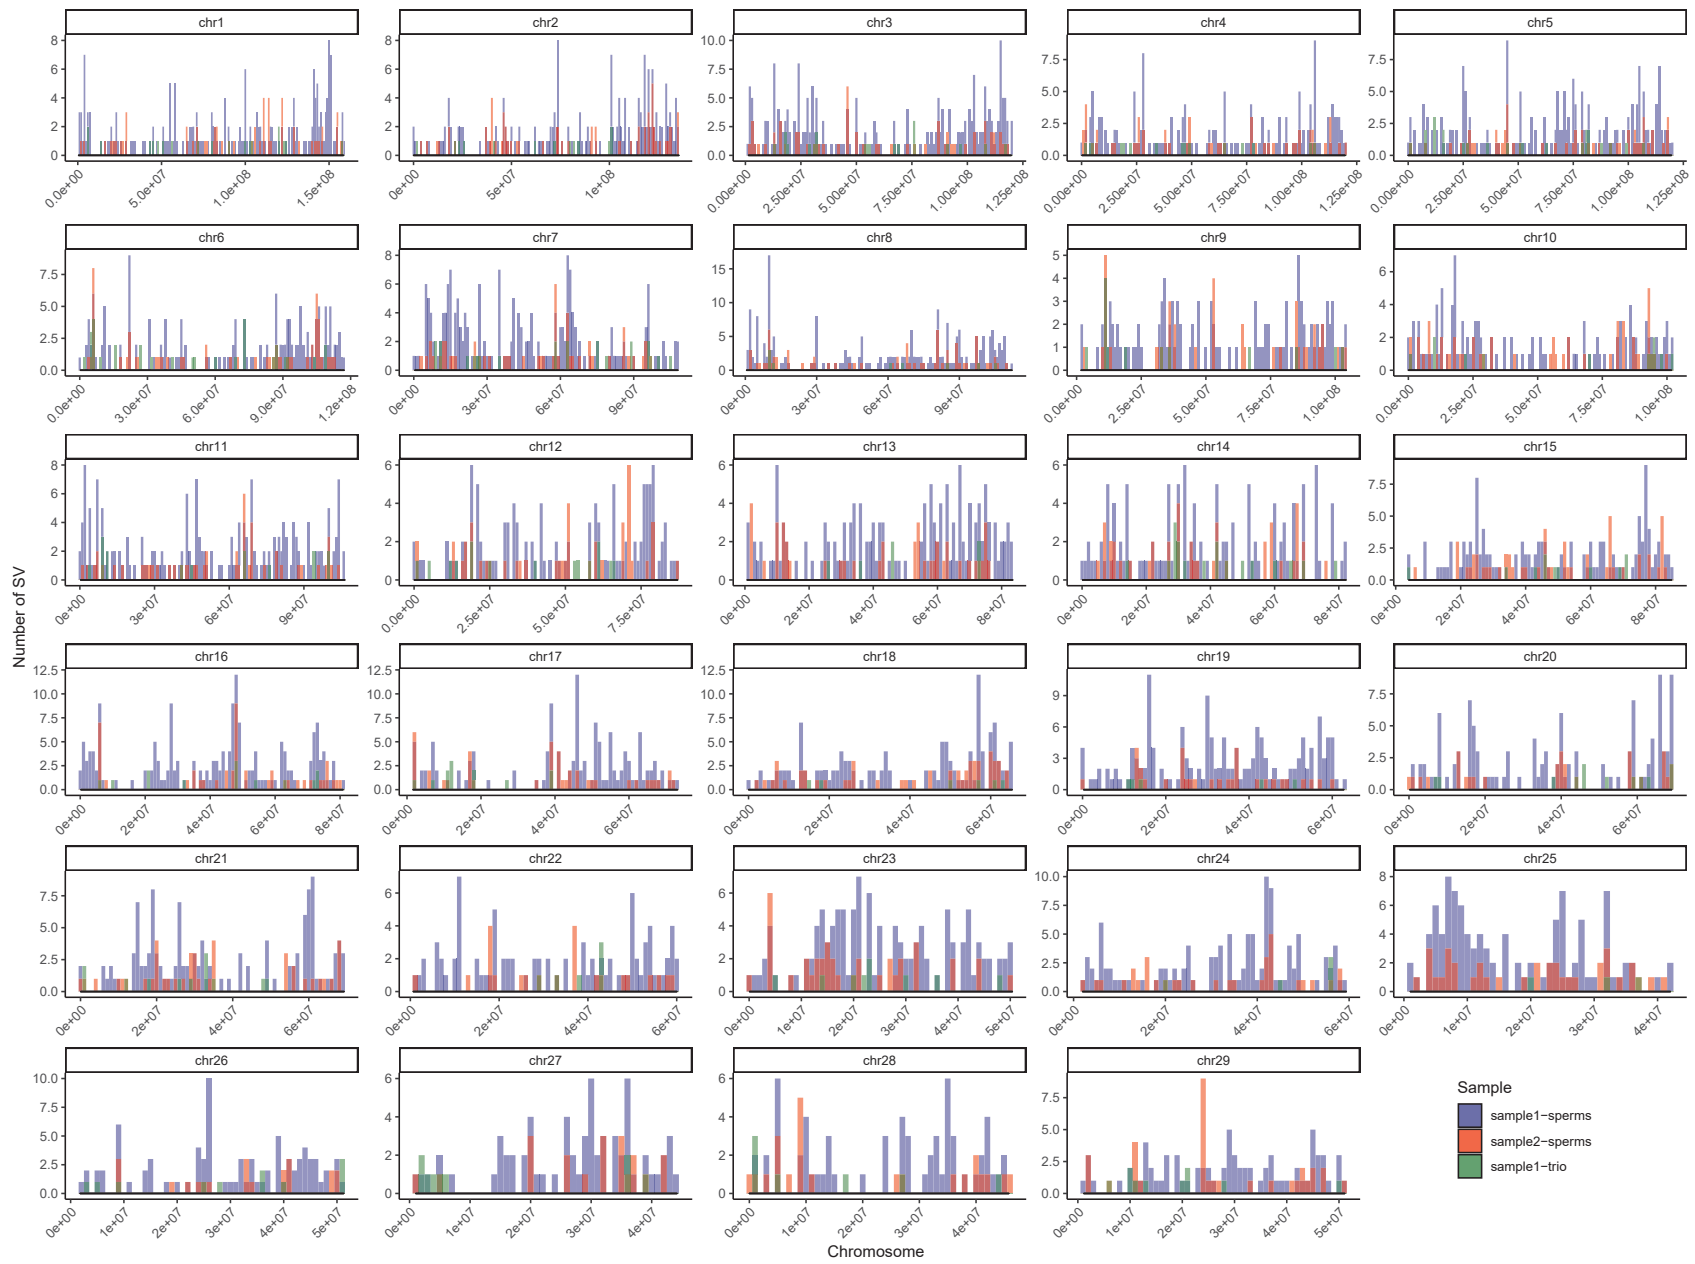

Figure S2. Venn plots for CNV (DEL and DUP) counts and lengths shared by trios and sperms.

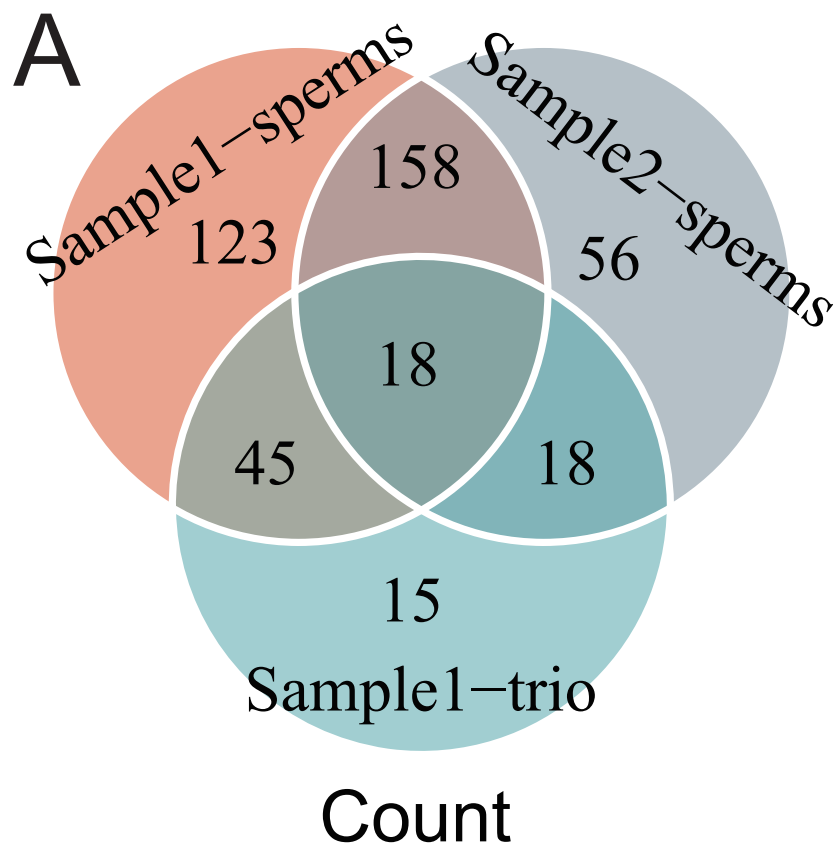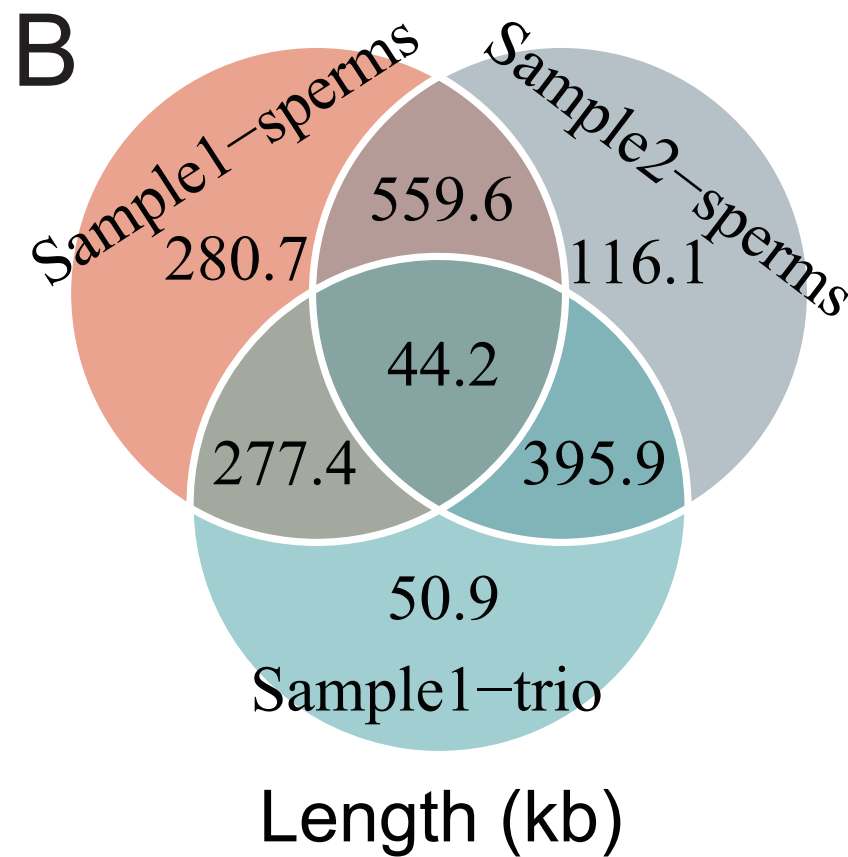

Figure S3. Normalized read depths along the genome in Sample1 trio.

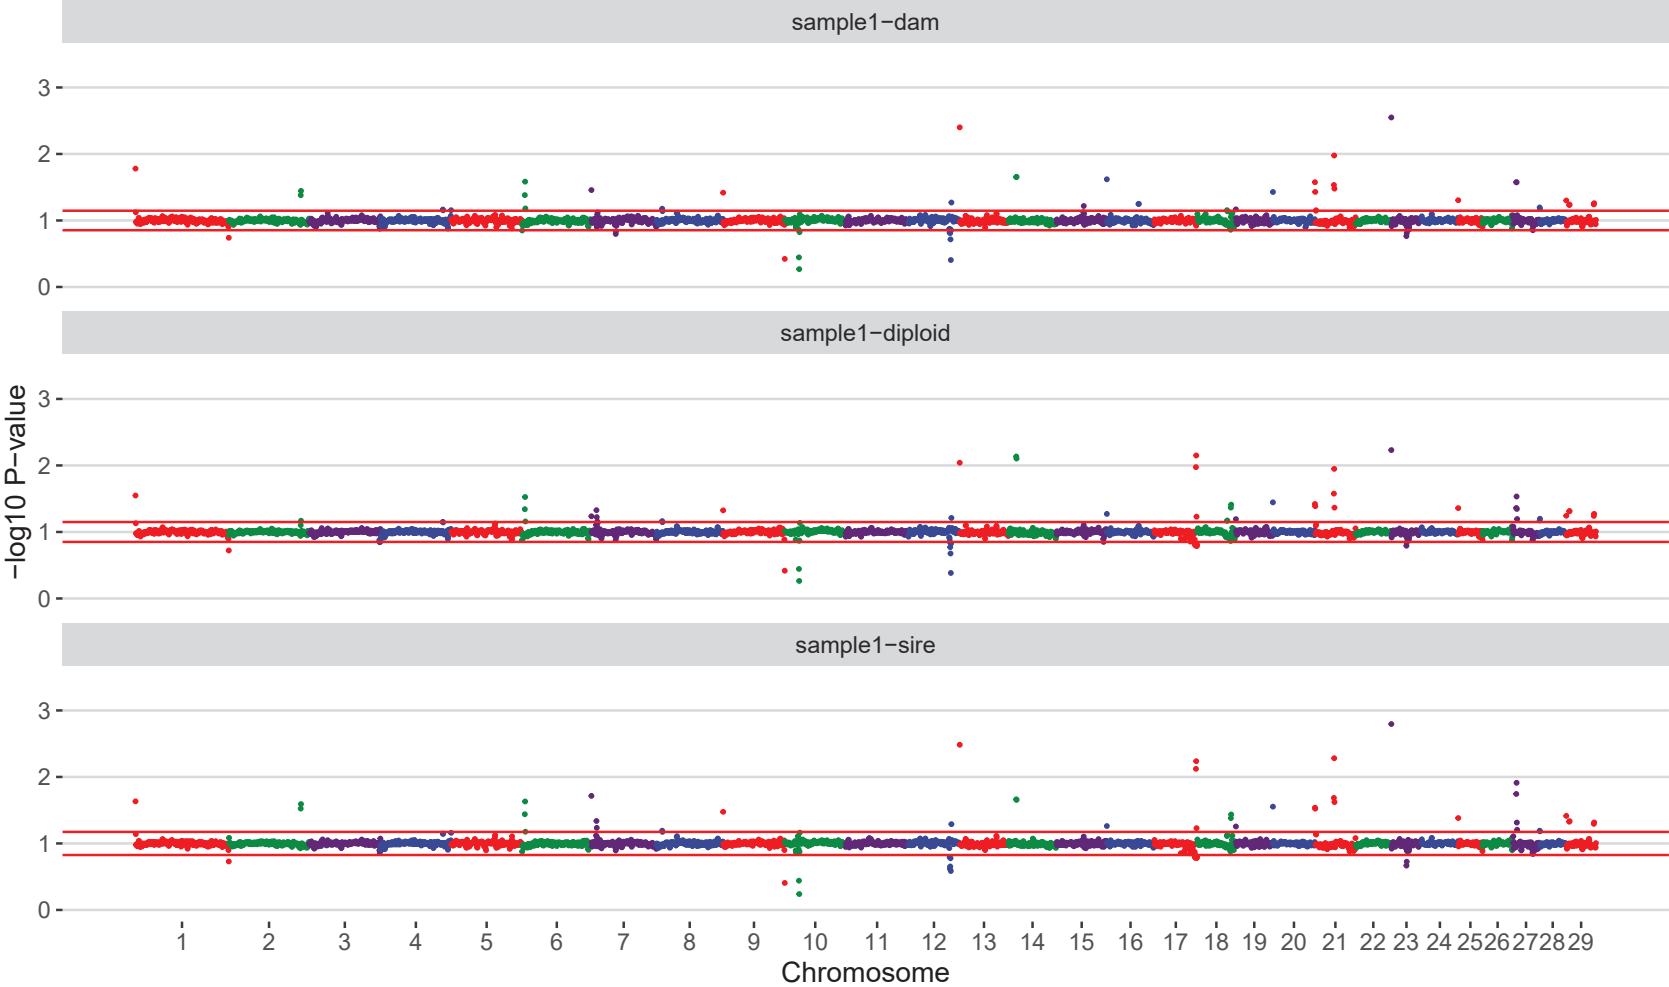

Figure S4. Normalized read depths along the genome in each sperm.

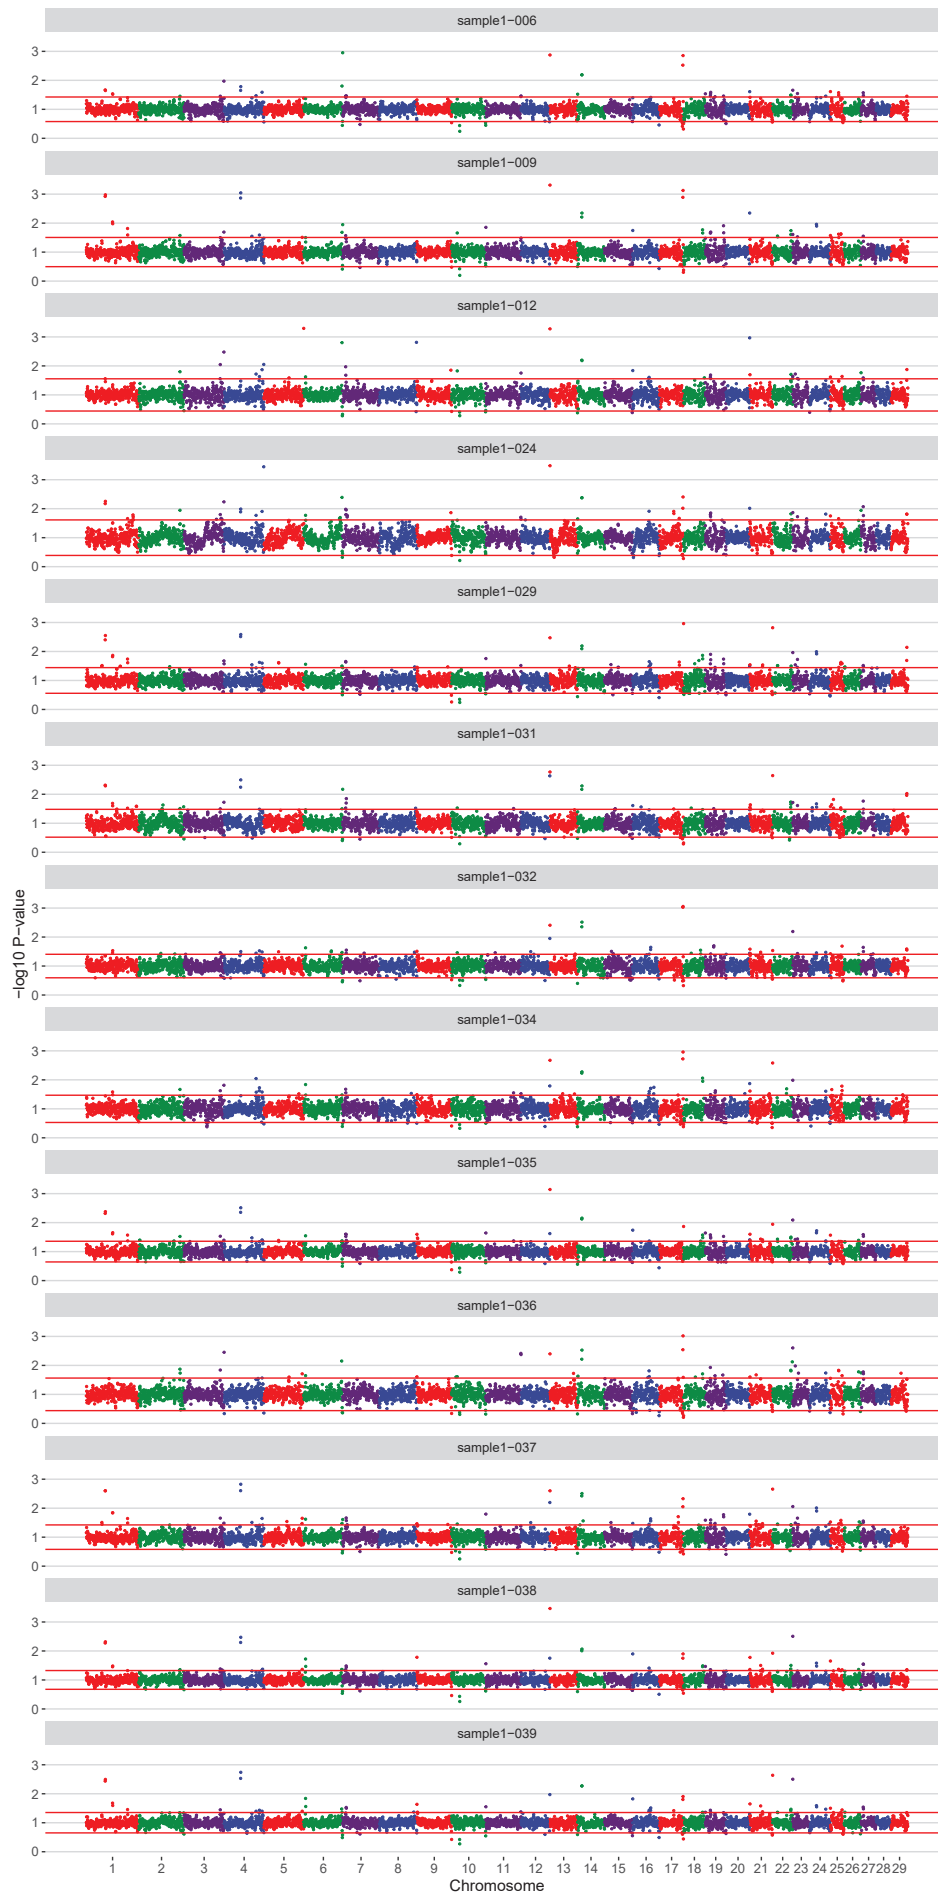

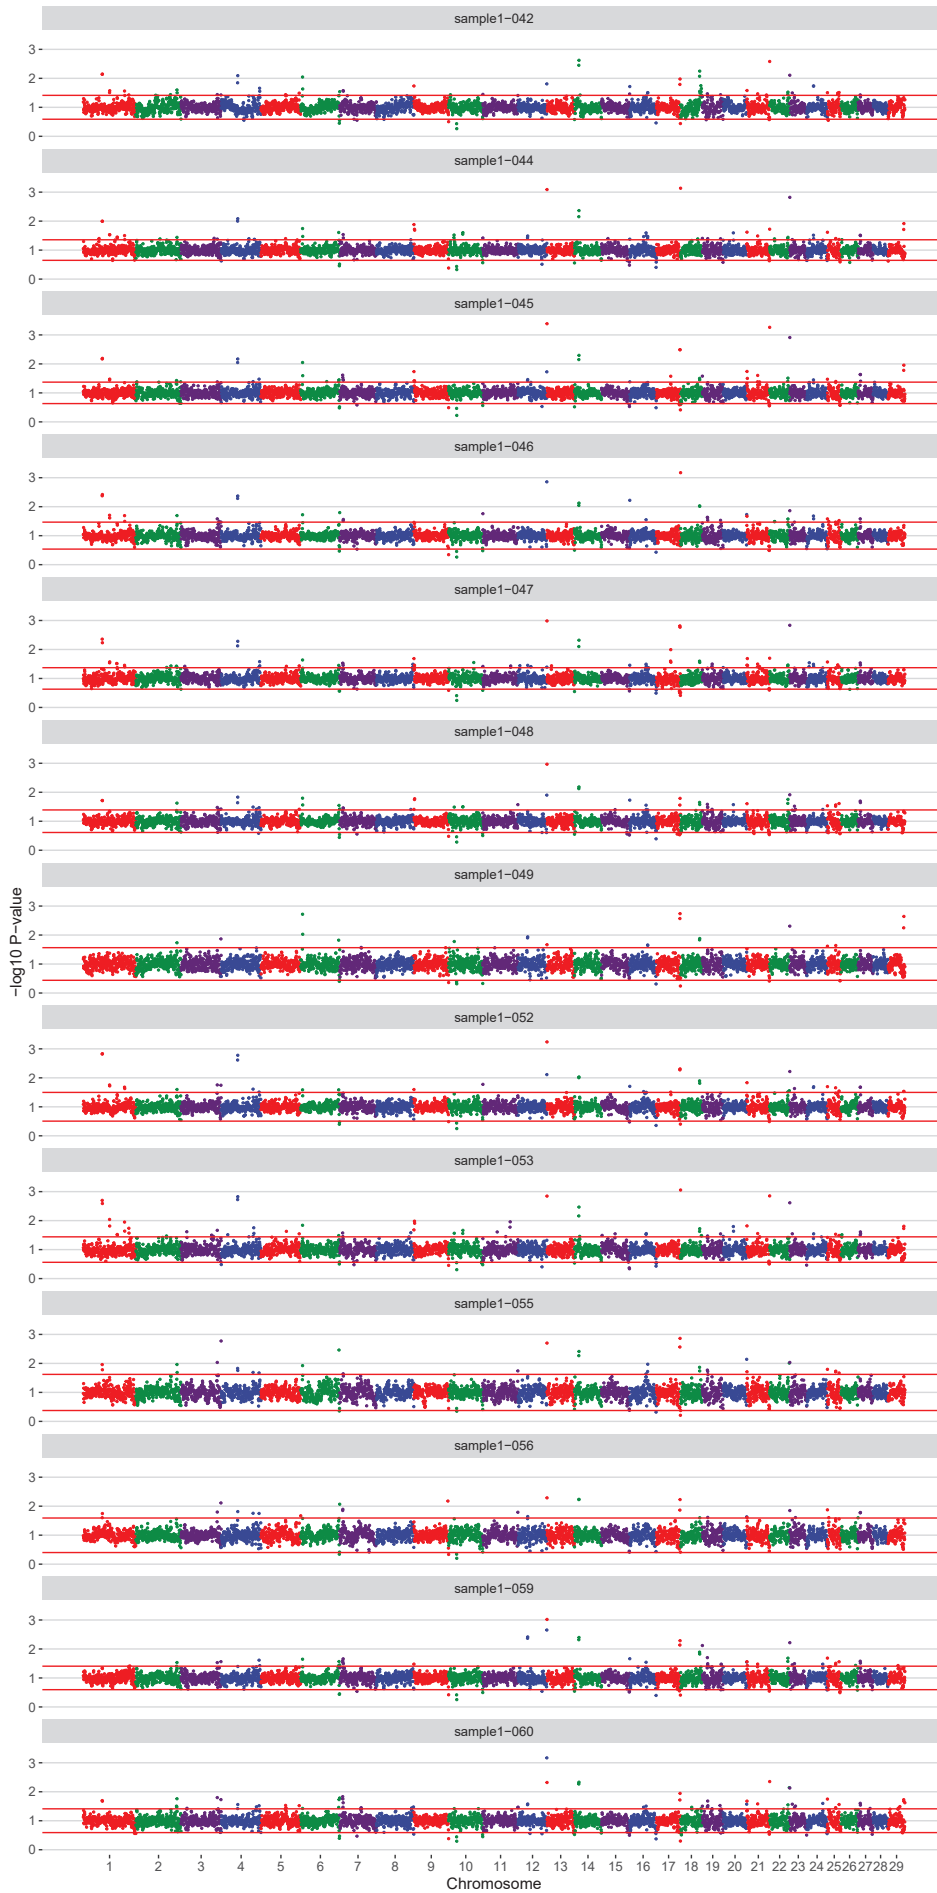

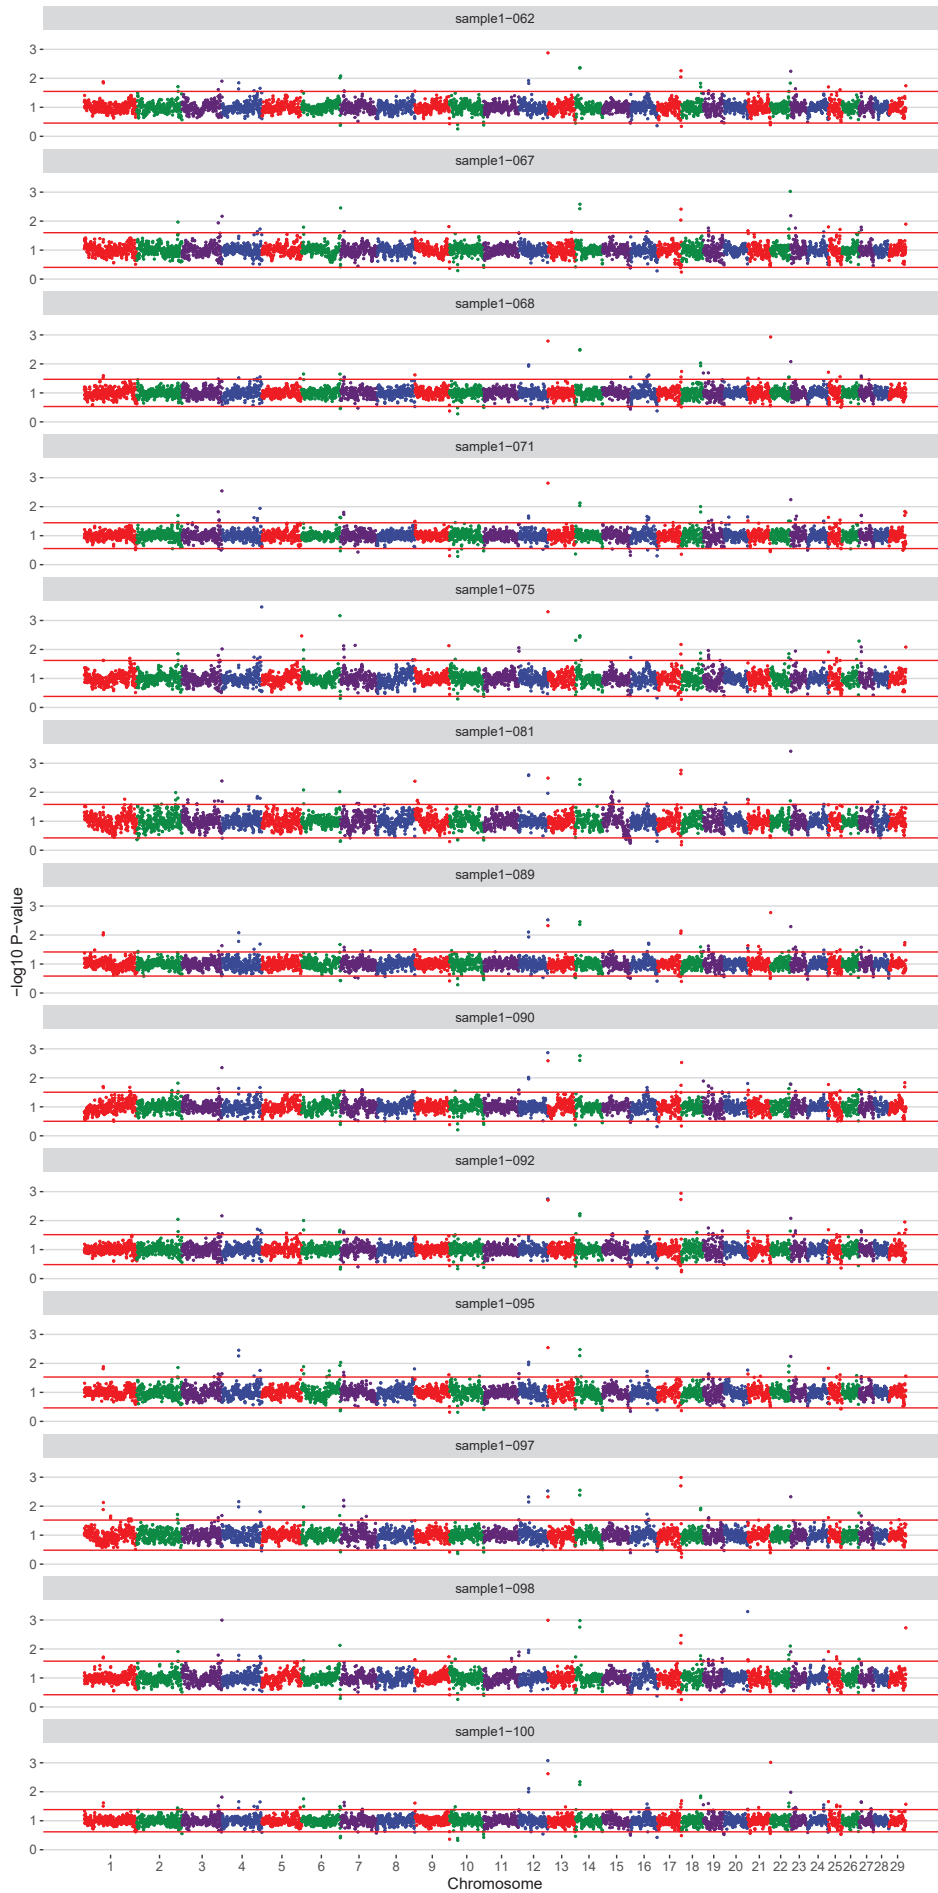

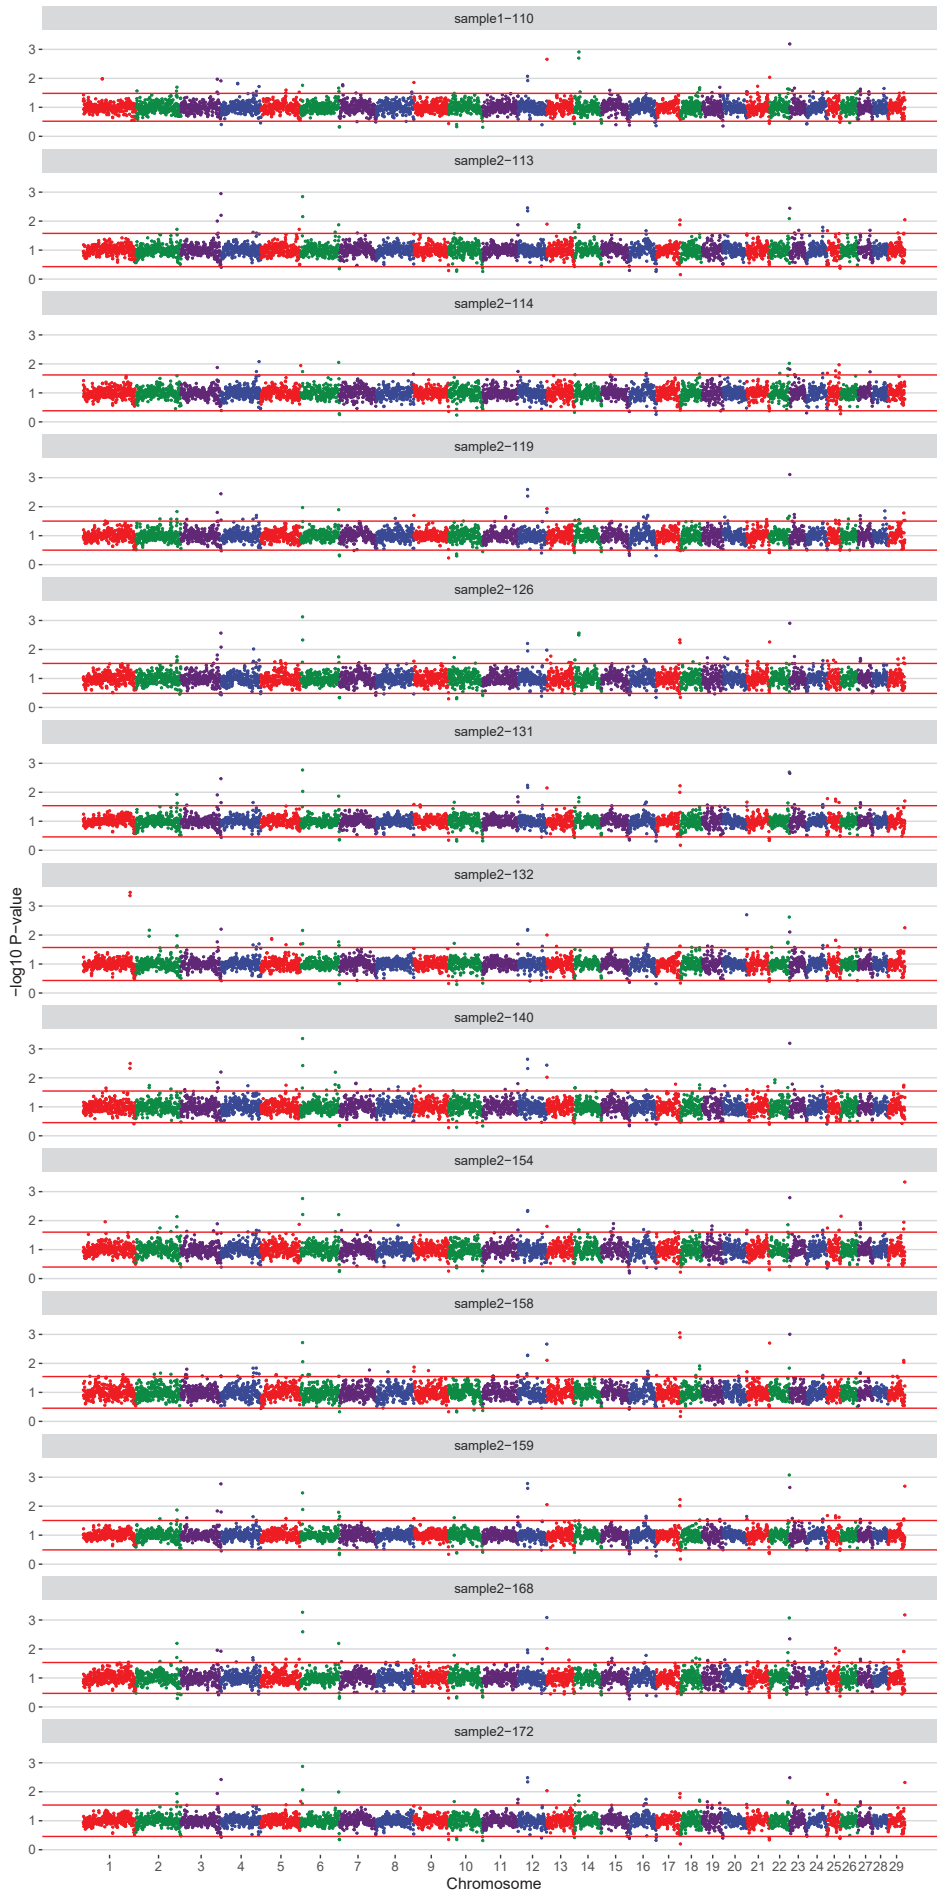

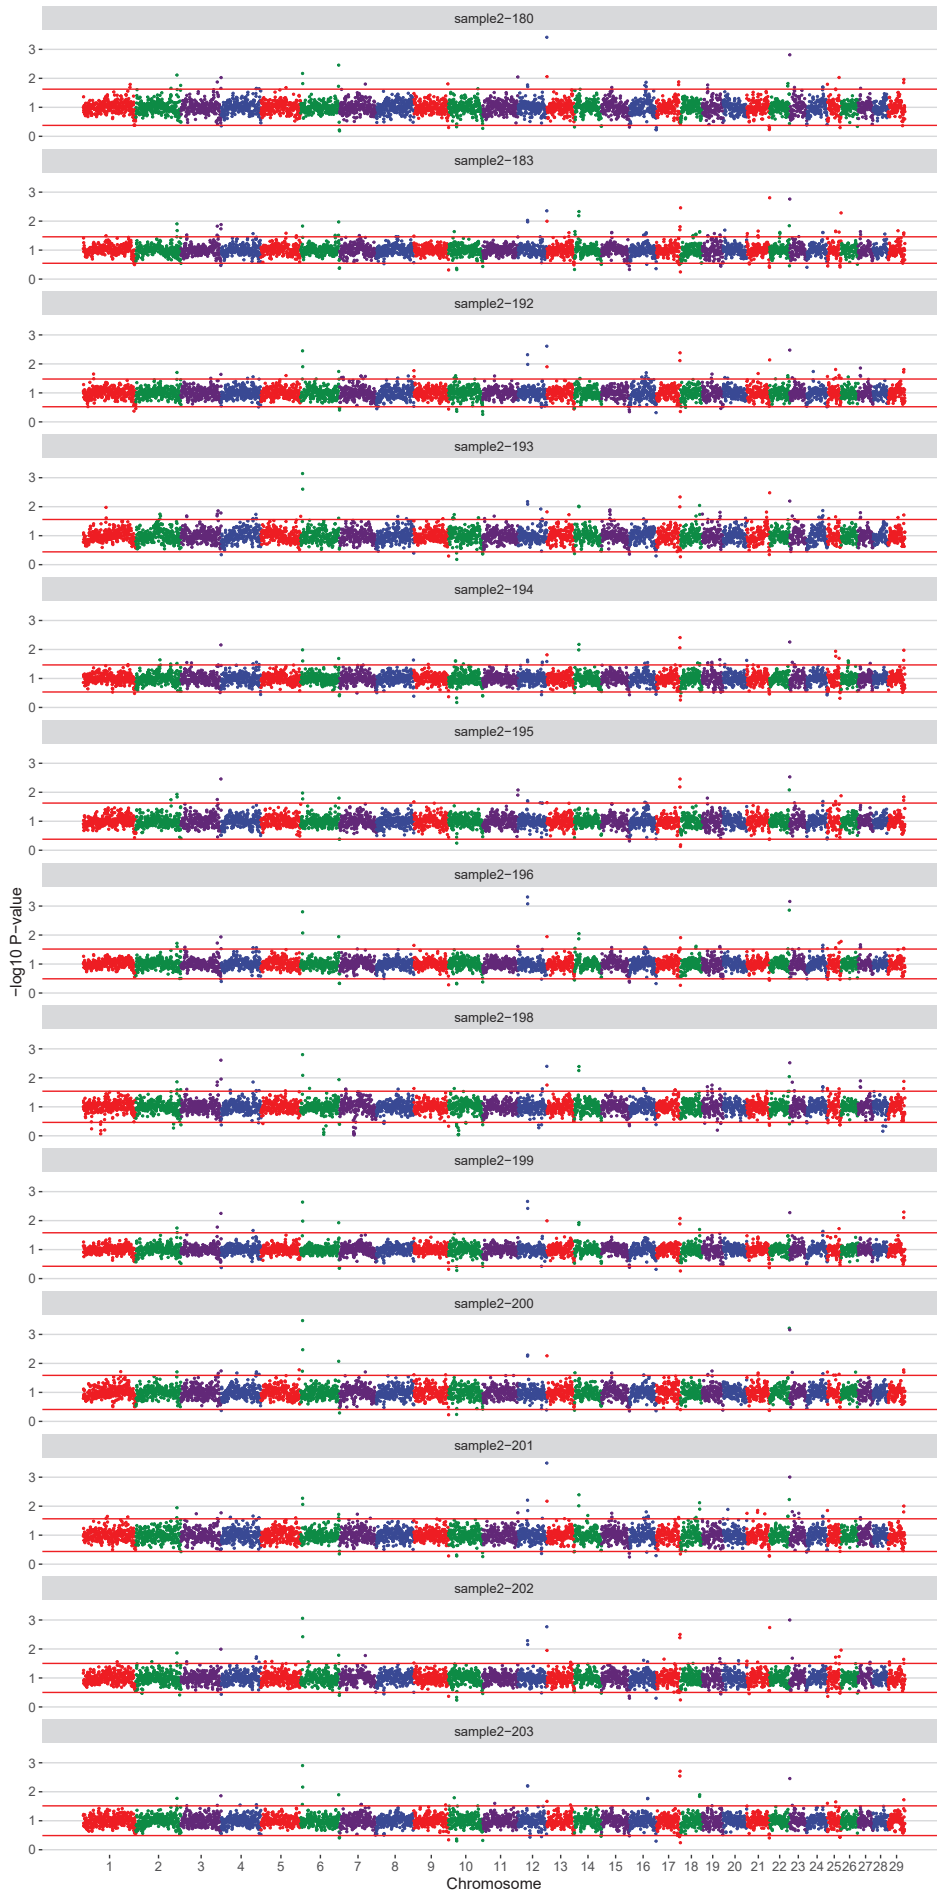



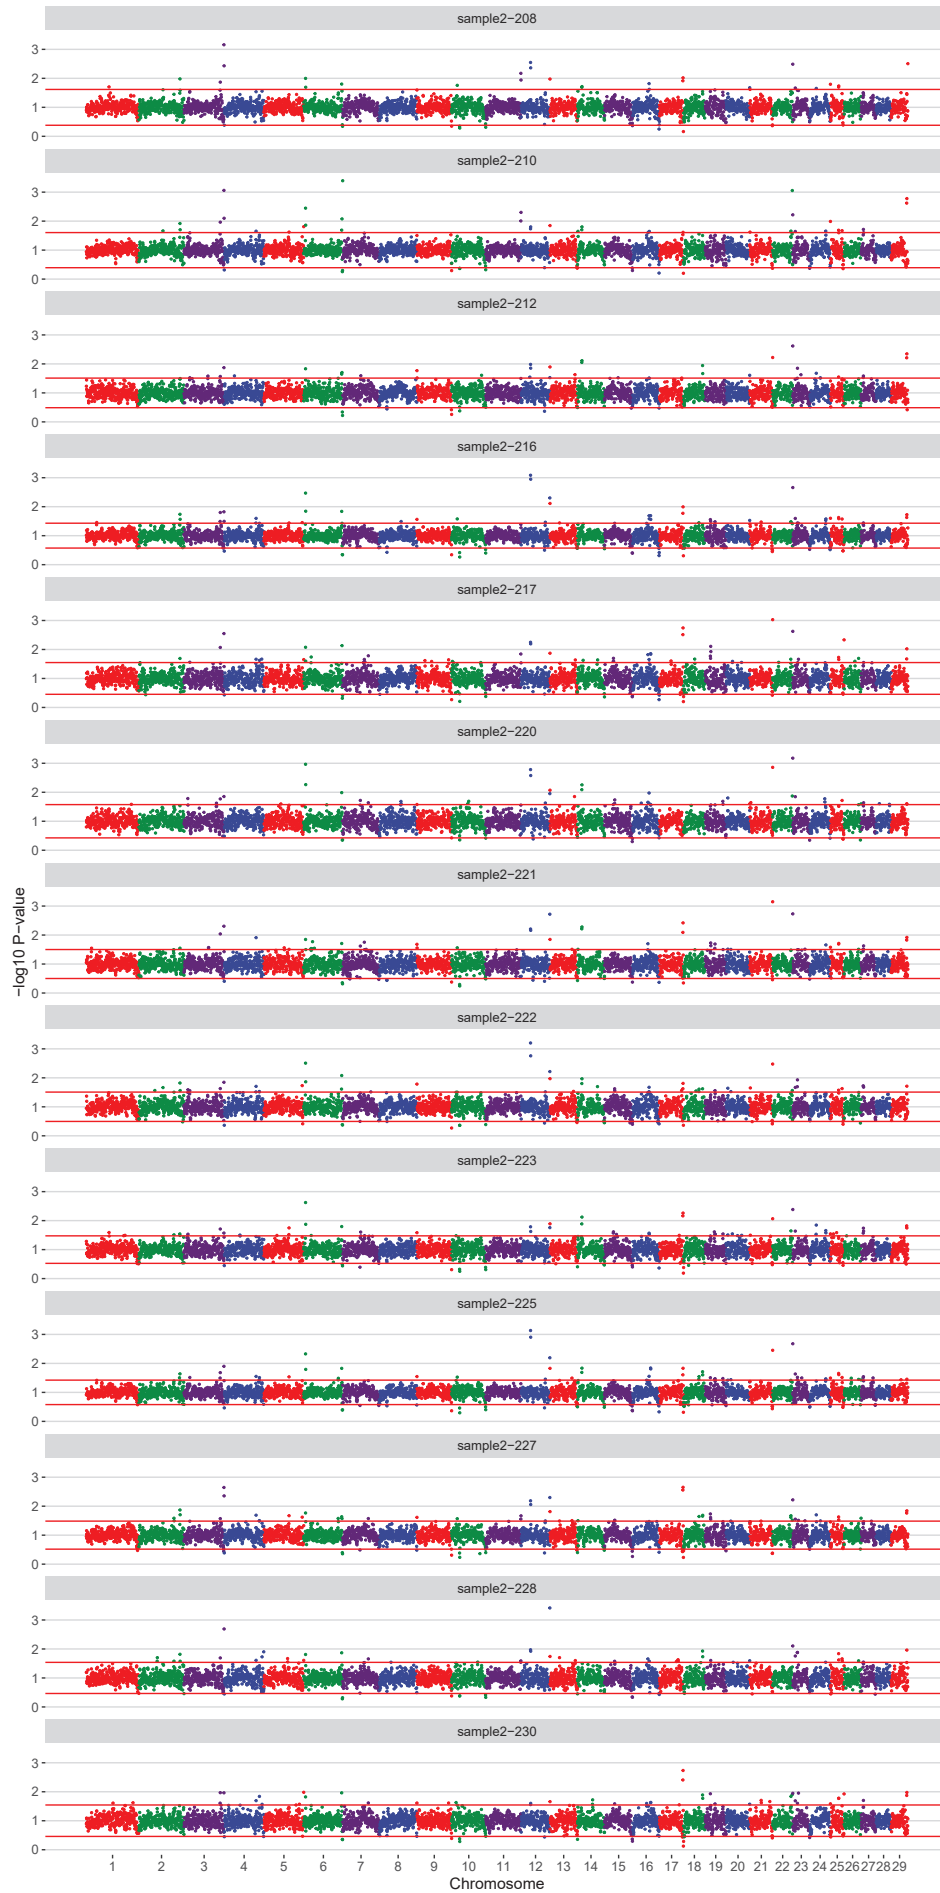

Supplement: 12864_2022_8441_MOESM1_ESM.pdf [file 12864_2022_8441_MOESM1_ESM.pdf]
